# Supplementary material for: Incidence of Neonatal Abstinence Syndrome (NAS) in Castilla y Leon (Spain)
Source: MDPI journal article supplement (doi:10.3390/children9010025), 2021-12-30
Supplement: s1 [file s1]

**Supplementary Table S1:** Incidence of NAS (expressed as rate per 1000 live births, ‰) in the nine provinces of Castilla y Leon and the total incidence in the entire region between 2000 and 2019.

| Year         | Ávila        | Burgos       | León         | Palencia     | Salamanca    | Segovia      | Soria        | Valladolid   | Zamora       | Castilla y león |
|--------------|--------------|--------------|--------------|--------------|--------------|--------------|--------------|--------------|--------------|-----------------|
| <b>2000</b>  | 5,172        | 1,439        | 1,563        | 2,597        | 2,350        | 0,000        | 0,000        | 2,579        | 3,247        | <b>2,126</b>    |
| <b>2001</b>  | 0,887        | 1,123        | 2,509        | 1,717        | 2,023        | 0,806        | 1,488        | 2,803        | 2,681        | <b>1,991</b>    |
| <b>2002</b>  | 0,890        | 2,145        | 1,257        | 0,838        | 1,190        | 1,592        | 0,000        | 1,205        | 4,085        | <b>1,492</b>    |
| <b>2003</b>  | 0,000        | 1,065        | 1,236        | 3,322        | 2,303        | 0,000        | 1,355        | 0,926        | 4,122        | <b>1,451</b>    |
| <b>2004</b>  | 0,000        | 0,337        | 1,211        | 0,861        | 1,118        | 0,767        | 1,393        | 0,909        | 0,870        | <b>0,847</b>    |
| <b>2005</b>  | 0,756        | 0,654        | 0,906        | 1,633        | 0,760        | 0,000        | 0,000        | 0,437        | 1,724        | <b>0,721</b>    |
| <b>2006</b>  | 0,000        | 0,961        | 0,304        | 1,603        | 2,663        | 0,000        | 0,000        | 1,043        | 1,681        | <b>1,011</b>    |
| <b>2007</b>  | 0,000        | 0,000        | 0,853        | 1,656        | 1,083        | 0,000        | 0,000        | 0,633        | 1,748        | <b>0,648</b>    |
| <b>2008</b>  | 0,000        | 0,284        | 0,854        | 3,130        | 1,725        | 0,000        | 0,000        | 0,594        | 1,645        | <b>0,845</b>    |
| <b>2009</b>  | 0,000        | 0,604        | 0,861        | 0,812        | 1,503        | 0,000        | 0,000        | 0,203        | 0,869        | <b>0,588</b>    |
| <b>2010</b>  | 0,000        | 0,595        | 0,582        | 0,842        | 0,382        | 0,000        | 0,000        | 0,588        | 1,692        | <b>0,537</b>    |
| <b>2011</b>  | 0,000        | 0,000        | 0,000        | 2,445        | 1,132        | 0,000        | 0,000        | 1,472        | 0,000        | <b>0,655</b>    |
| <b>2012</b>  | 0,797        | 0,320        | 0,625        | 0,000        | 1,196        | 0,000        | 0,000        | 0,644        | 0,000        | <b>0,525</b>    |
| <b>2013</b>  | 0,000        | 1,000        | 0,986        | 1,742        | 0,442        | 0,000        | 0,000        | 1,622        | 0,000        | <b>0,898</b>    |
| <b>2014</b>  | 0,000        | 1,418        | 1,317        | 1,695        | 0,428        | 0,000        | 0,000        | 1,160        | 2,907        | <b>1,062</b>    |
| <b>2015</b>  | 0,000        | 0,362        | 0,330        | 0,000        | 0,427        | 0,000        | 0,000        | 0,477        | 1,032        | <b>0,345</b>    |
| <b>2016</b>  | 1,765        | 0,752        | 1,394        | 1,910        | 0,000        | 0,000        | 0,000        | 0,248        | 0,000        | <b>0,660</b>    |
| <b>2017</b>  | 0,000        | 0,815        | 0,000        | 0,929        | 0,986        | 0,000        | 0,000        | 0,544        | 2,212        | <b>0,580</b>    |
| <b>2018</b>  | 3,064        | 0,425        | 0,760        | 0,000        | 1,928        | 0,000        | 0,000        | 0,866        | 0,000        | <b>0,864</b>    |
| <b>2019</b>  | 0,000        | 0,000        | 0,422        | 0,000        | 1,552        | 0,000        | 0,000        | 0,608        | 0,000        | <b>0,419</b>    |
| <b>TOTAL</b> | <b>0,614</b> | <b>0,700</b> | <b>0,907</b> | <b>1,424</b> | <b>1,275</b> | <b>0,156</b> | <b>0,220</b> | <b>0,959</b> | <b>1,603</b> | <b>0,912</b>    |

**Supplementary Table S2:** Normalized incidence of NAS (expressed as fraction of control  $\equiv$  cumulative incidence of NAS for the entire region) in the nine provinces of Castilla y Leon between 2000 and 2019.

| Year         | Ávila        | Burgos       | León         | Palencia     | Salamanca    | Segovia      | Soria        | Valladolid   | Zamora       | Castilla y león |
|--------------|--------------|--------------|--------------|--------------|--------------|--------------|--------------|--------------|--------------|-----------------|
| 2000         | 5,670        | 1,578        | 1,713        | 2,847        | 2,576        | 0            | 0            | 2,827        | 3,559        | 2,330           |
| 2001         | 0,972        | 1,231        | 2,751        | 1,882        | 2,217        | 0,884        | 1,631        | 3,073        | 2,939        | 2,182           |
| 2002         | 0,976        | 2,351        | 1,378        | 0,919        | 1,304        | 1,745        | 0            | 1,320        | 4,478        | 1,635           |
| 2003         | 0            | 1,167        | 1,355        | 3,642        | 2,525        | 0            | 1,485        | 1,015        | 4,518        | 1,591           |
| 2004         | 0            | 0,369        | 1,327        | 0,944        | 1,226        | 0,841        | 1,527        | 0,996        | 0,953        | 0,928           |
| 2005         | 0,829        | 0,717        | 0,993        | 1,790        | 0,833        | 0            | 0            | 0,479        | 1,890        | 0,790           |
| 2006         | 0            | 1,053        | 0,333        | 1,757        | 2,919        | 0            | 0            | 1,144        | 1,842        | 1,109           |
| 2007         | 0            | 0            | 0,936        | 1,815        | 1,187        | 0            | 0            | 0,694        | 1,916        | 0,710           |
| 2008         | 0            | 0,311        | 0,937        | 3,431        | 1,891        | 0            | 0            | 0,651        | 1,803        | 0,926           |
| 2009         | 0            | 0,662        | 0,944        | 0,890        | 1,648        | 0            | 0            | 0,223        | 0,952        | 0,644           |
| 2010         | 0            | 0,652        | 0,638        | 0,923        | 0,419        | 0            | 0            | 0,645        | 1,855        | 0,589           |
| 2011         | 0            | 0            | 0            | 2,680        | 1,240        | 0            | 0            | 1,613        | 0            | 0,717           |
| 2012         | 0,873        | 0,351        | 0,685        | 0            | 1,311        | 0            | 0            | 0,706        | 0            | 0,576           |
| 2013         | 0            | 1,097        | 1,080        | 1,910        | 0,484        | 0            | 0            | 1,778        | 0            | 0,984           |
| 2014         | 0            | 1,554        | 1,443        | 1,858        | 0,469        | 0            | 0            | 1,271        | 3,186        | 1,164           |
| 2015         | 0            | 0,397        | 0,362        | 0            | 0,468        | 0            | 0            | 0,523        | 1,131        | 0,378           |
| 2016         | 1,935        | 0,825        | 1,528        | 2,094        | 0            | 0            | 0            | 0,272        | 0            | 0,723           |
| 2017         | 0            | 0,894        | 0            | 1,019        | 1,081        | 0            | 0            | 0,597        | 2,425        | 0,636           |
| 2018         | 3,359        | 0,466        | 0,833        | 0            | 2,113        | 0            | 0            | 0,950        | 0            | 0,947           |
| 2019         | 0            | 0            | 0,463        | 0            | 1,701        | 0            | 0            | 0,667        | 0            | 0,459           |
| <b>TOTAL</b> | <b>0,673</b> | <b>0,768</b> | <b>0,995</b> | <b>1,561</b> | <b>1,397</b> | <b>0,171</b> | <b>0,241</b> | <b>1,051</b> | <b>1,757</b> | <b>1,000</b>    |

**Supplementary Table S3:** Average incidence of NAS in Castilla y León (average  $\pm$  S.D. incidence of NAS in the nine provinces), expressed as rate per 1000 live births, ‰ between 2000 and 2019.

| Year | Incidence         |
|------|-------------------|
| 2000 | 2,105 $\pm$ 1,614 |
| 2001 | 1,782 $\pm$ 0,768 |
| 2002 | 1,467 $\pm$ 1,140 |
| 2003 | 1,592 $\pm$ 1,409 |
| 2004 | 0,830 $\pm$ 0,432 |
| 2005 | 0,763 $\pm$ 0,611 |
| 2006 | 0,917 $\pm$ 0,937 |
| 2007 | 0,664 $\pm$ 0,719 |
| 2008 | 0,915 $\pm$ 1,067 |
| 2009 | 0,539 $\pm$ 0,525 |
| 2010 | 0,520 $\pm$ 0,539 |
| 2011 | 0,561 $\pm$ 0,908 |
| 2012 | 0,398 $\pm$ 0,440 |
| 2013 | 0,644 $\pm$ 0,716 |
| 2014 | 0,992 $\pm$ 0,984 |
| 2015 | 0,292 $\pm$ 0,344 |
| 2016 | 0,674 $\pm$ 0,809 |
| 2017 | 0,610 $\pm$ 0,737 |
| 2018 | 0,783 $\pm$ 1,067 |
| 2019 | 0,287 $\pm$ 0,526 |
